# Supplementary material for: Application of positron annihilation lifetime spectroscopy (PALS) to study the nanostructure in amphiphile self-assembly materials: phytantriol cubosomes and hexosomes
Source: Royal Society of Chemistry journal article supplement (doi:10.1039/c4cp04343j), 2014-12-02
Supplement: c4cp04343j1.pdf [file c4cp04343j1.pdf]

## Application of Positron Annihilation Lifetime Spectroscopy (PALS) to Study the Nanostructure in Amphiphile Self-Assembly Materials: Phytantriol Cubosomes and Hexosomes

Aurelia W. Dong,<sup>1,2</sup> Celesta Fong,<sup>2</sup> Lynne J. Waddington,<sup>3</sup> Anita J. Hill,<sup>4</sup> Ben J Boyd<sup>1,5</sup> \* and Calum J. Drummond<sup>2,6\*</sup>.

<sup>1</sup> Drug Delivery, Disposition and Dynamics, Monash Institute of Pharmaceutical Sciences, Monash University (Parkville Campus), 381 Royal Parade, Parkville, VIC 3052, Australia

<sup>2</sup> CSIRO Manufacturing Flagship, 343 Royal Parade, Parkville, VIC 3052, Australia

<sup>3</sup> CSIRO Manufacturing Flagship, Private Bag 33, Clayton, VIC 3169, Australia

<sup>4</sup> CSIRO Manufacturing, Productivity and Services, PO Box 312, Clayton, VIC 3169, Australia

<sup>5</sup> ARC Centre of Excellence in Convergent Bio-Nano Science and Technology, Monash Institute of Pharmaceutical Sciences, Monash University (Parkville Campus), 381 Royal Parade, Parkville, VIC 3052, Australia

<sup>6</sup> School of Applied Sciences, College of Science Engineering and Health, GPO Box 2476, RMIT University, Melbourne, VIC 3001, Australia

Corresponding Authors: [calum.drummond@rmit.edu.au](mailto:calum.drummond@rmit.edu.au); [ben.boyd@monash.edu](mailto:ben.boyd@monash.edu)

### SUPPLEMENTARY INFORMATION

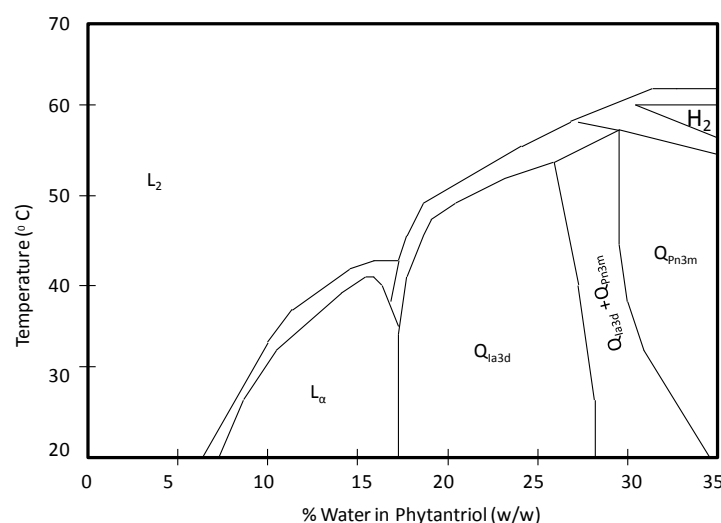

Figure S1 Partial phase diagram of phytantriol -water system (re-drawn from Dong *et al.*<sup>1</sup>)

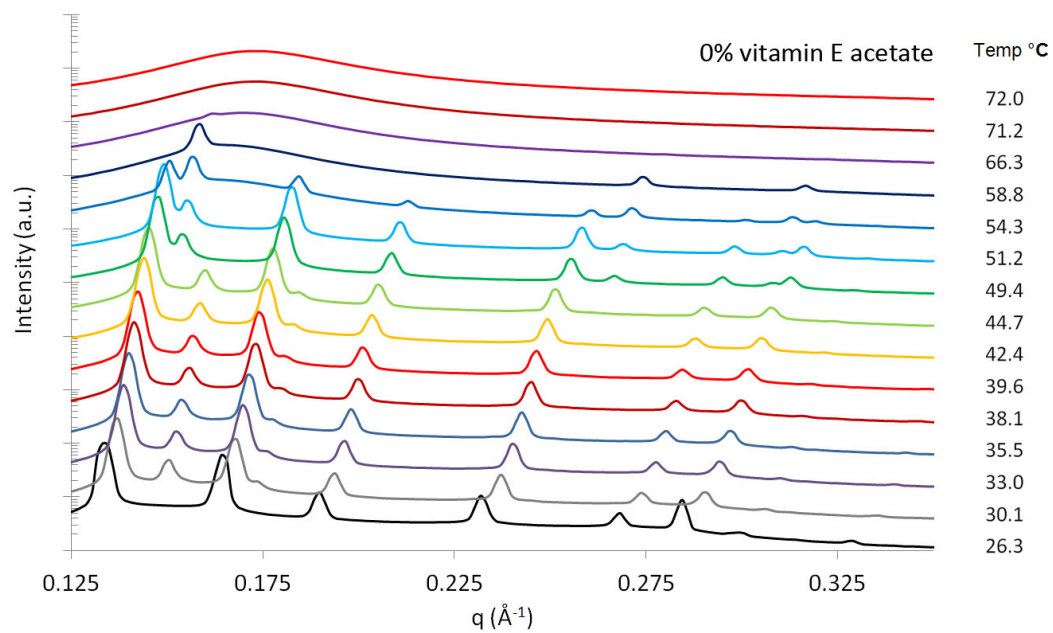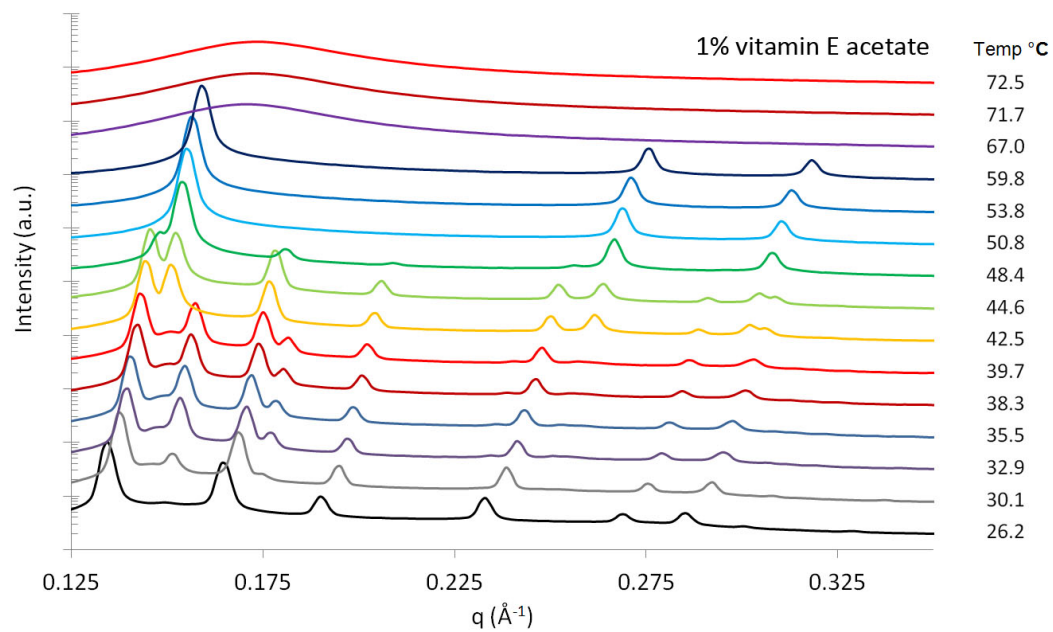

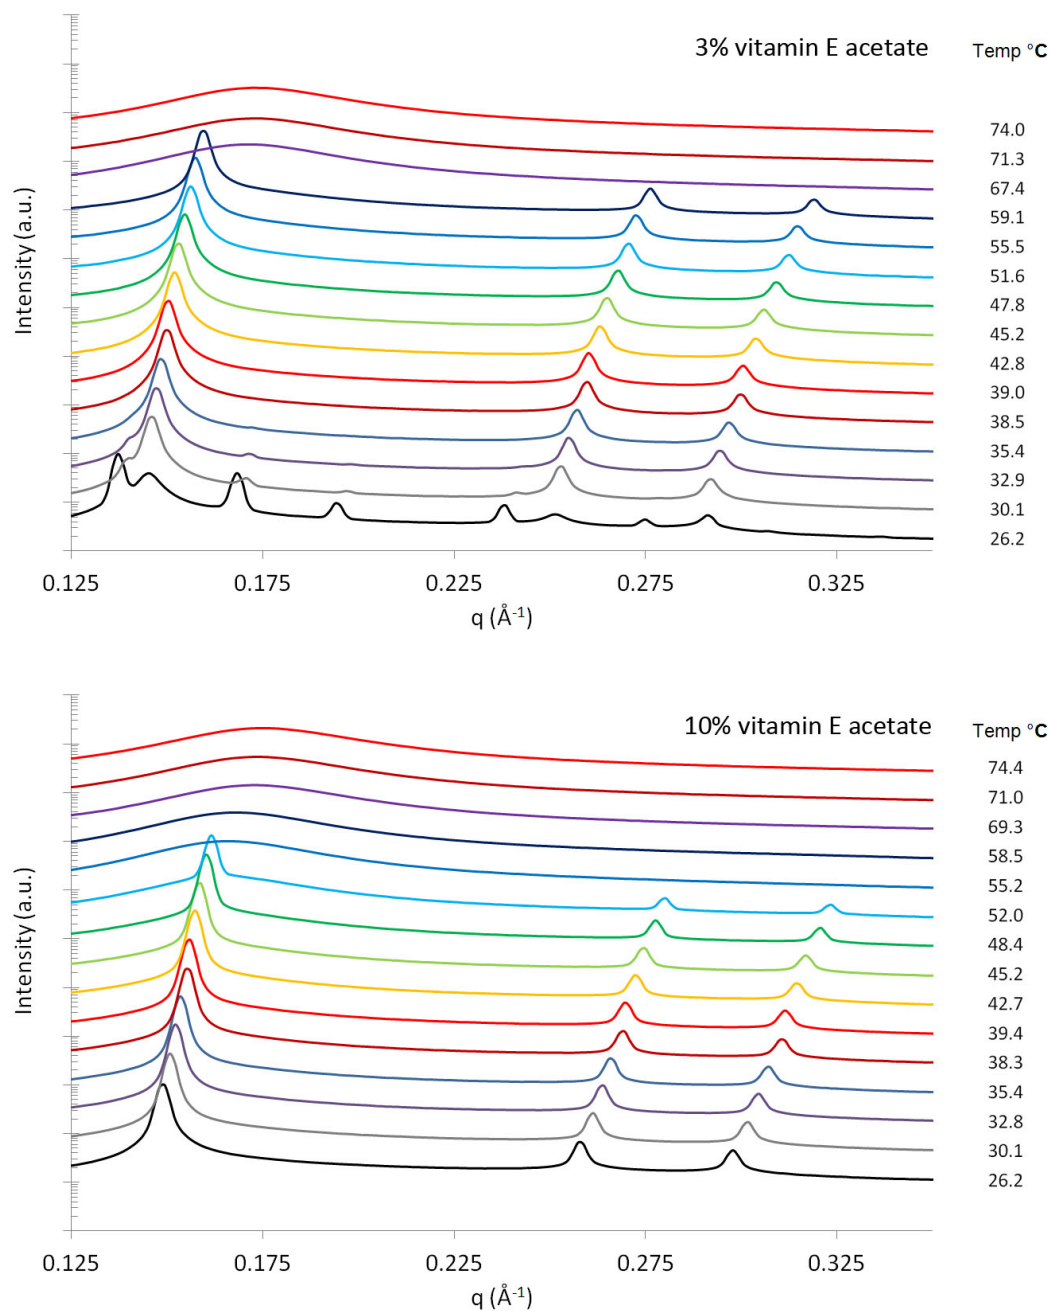

Figure S2: Waterfall plots of SAXS profiles with increasing temperature for dispersed phytantriol systems with 0, 1, 3 and 10% w/w vitamin E acetate.

## REFERENCE

(1) Dong, Y. D.; Dong, A. W.; Larson, I.; Rappolt, M.; Amenitsch, H.; Hanley, T.; Boyd, B. J.: Impurities in commercial phytantriol significantly alter its lyotropic liquid-crystalline phase behaviour *Langmuir* 2008, **24**, 6998-7003.
